# Supplementary material for: The Peptide Methionine Sulfoxide Reductase (MsrAB) of Haemophilus influenzae Repairs Oxidatively Damaged Outer Membrane and Periplasmic Proteins Involved in Nutrient Acquisition and Virulence
Source: MDPI journal article supplement (doi:10.3390/antiox11081557), 2022-08-11

**Table S1:** Properties of proteins with a Trx motif (CXXC) in Hi2019. Grey shaded indicated the Trx<sub>e</sub> and Trx used in the study.

| Accession No   | Protein name                               | Signal Peptide | No. of amino acids | Molecular mass mature proteins (Da) | Gene locus   | pI   |
|----------------|--------------------------------------------|----------------|--------------------|-------------------------------------|--------------|------|
| WP_005689970.1 | thioredoxin (Trx)                          | No             | 107                | 11640.5                             | C645_RS00695 | 4.85 |
| WP_005688304.1 | protein disulfide oxidoreductase (TlpA)    | No             | 167                | 19104.1                             | C645_RS06420 | 9.06 |
| WP_005689328.1 | thioredoxin-disulfide reductase (TrxR)     | No             | 318                | 34398.8                             | C645_RS06360 | 5.24 |
| WP_042594435.1 | thiol:disulfide interchange protein (DsbE) | Yes            | 181                | 20528.9                             | C645_RS05695 | 6.18 |
| WP_046067689.1 | thiol:disulfide interchange protein (DsbD) | Yes            | 579                | 62460.7                             | C645_RS05395 | 6.29 |
| WP_005631815.1 | Redoxin family protein (Trx <sub>e</sub> ) | Yes            | 156                | 15598.8                             | C645_RS08405 | 5.4  |

**Table S2:** Thioredoxin-related proteins in *H. influenzae* 2019 that are close homologues to *E. coli* K12 and *N. gonorrhoeae* FA 1090 thioredoxins.

| Accession No.  | <i>H. influenzae</i><br>protein<br>annotation  | Closest homologue in<br><i>E. coli</i> or <i>N.</i><br><i>gonorrhoeae</i>                                                                         | Query<br>cover | AA<br>identity | <i>H. influenzae</i><br>gene Locus |
|----------------|------------------------------------------------|---------------------------------------------------------------------------------------------------------------------------------------------------|----------------|----------------|------------------------------------|
| WP_005689970.1 | Thiol reductase<br>thioredoxin                 | WP_001280776.1,<br>Thioredoxin TrxA [ <i>E. coli</i> MG1655]                                                                                      | 96%            | 51.43%         | C645_RS00695                       |
| WP_046067700.1 | Thiol:disulfide<br>interchange<br>protein DsbE | WP_000824439.1,<br>thiol:disulfide<br>interchange protein<br>DsbE [ <i>E. coli</i> MG1655]                                                        | 77%            | 44.06%         | C645_RS05695                       |
| WP_005688304.1 | protein disulfide<br>oxidoreductase            | WP_003687293.1,<br>protein disulfide<br>oxidoreductase [ <i>N. gonorrhoeae</i> FA 1090]                                                           | 98%            | 45.18%         | C645_RS06420                       |
| WP_042594435.1 | Thiol:disulfide<br>interchange<br>protein      | WP_000824439.1,<br>thiol:disulfide<br>interchange protein<br>DsbE [ <i>E. coli</i> MG1655]                                                        | 84%            | 57.96%         | C645_RS06360                       |
| WP_005689328.1 | Thioredoxin-<br>disulfide<br>reductase         | WP_000537418.1,<br>thioredoxin-disulfide<br>reductase [ <i>E. coli</i> MG1655]                                                                    | 98%            | 76.51%         | C645_RS06915                       |
| WP_046067689.1 | Thiol:disulfide<br>interchange<br>protein      | WP_003696987.1<br>protein-disulfide<br>reductase DsbD [ <i>N. gonorrhoeae</i> FA 1090]                                                            | 93%            | 34.95%         | C645_RS05395                       |
| WP_005631815.1 | hypothetical<br>protein                        | WP_010951394.1,<br>(Trx domain)<br>Trifunctional<br>thioredoxin/methionine<br>sulfoxide reductase<br>A/B protein [ <i>N. gonorrhoeae</i> FA 1090] | 78%            | 32.26%         | C645_RS08405                       |

**Table S3:** Mass spectrometry data -peptide sequencing data. Separate Excel spreadsheet.

**Table S4:** putative *H. influenzae* MsrAB substrate proteins identified using outer membrane preparations. Yellow– also differentially oxidized in whole cell proteome

|                          |                                                                 |                                          | % MetSO |               |
|--------------------------|-----------------------------------------------------------------|------------------------------------------|---------|---------------|
| Accession                | Protein name                                                    | Peptides                                 | WT      | <i>ΔmsrAB</i> |
| <b>Membrane proteins</b> |                                                                 |                                          |         |               |
| WP_046067692.1           | Outer membrane protein assembly factor BamA                     | FEGNTVSADSTLRQEMRQQEGTWYNSQLVELGK        | 85      | 100           |
|                          | Outer membrane protein assembly factor BamA                     | IVGNVGGMSAELEPLLSALHLNDTFR               | 47.1    | 64.52         |
| WP_005656589.1           | Membrane protein                                                | NLLNLKPNEALNITFPHIMNVK                   | 37      | 100           |
| WP_046067790.1           | HMW2B, OMP-85 required for HMW1A and HMW2A secretion            | TAQLELQAVLDKIEPNKFDVVLPQQTITDGNVMFELVS K | 30      | 100           |
| <b>Others</b>            |                                                                 |                                          |         |               |
| WP_005658614.1           | Hypothetical protein                                            | QLTGAVVDAAYMYPFWQWVGGPWALVK              | 55      | 76            |
| WP_046067852.1           | Penicillin-binding protein                                      | QNLDVILADPAQIQGMDVLALNATPNSR             | 31      | 73            |
| WP_005667564.1           | Elongation factor Tu                                            | TTDVTGTIELPEGVEMVMPPGDNIK                | 44      | 100           |
| <b>Enzymes</b>           |                                                                 |                                          |         |               |
| WP_005661229.1           | Glycerophosphoryl diester phosphodiesterase (Protein D)         | YADGVGPGWYMLVNK                          | 28      | 35            |
| WP_005631652.1           | PntA NAD(P) transhydrogenase subunit alpha                      | AQALDALSSMANISGYR                        | 30      | 45            |
| WP_005657875.1           | LldAlpha-hydroxy-acid oxidizing enzyme                          | MIISSASDYR                               | 0       | 100           |
| <b>Transporter</b>       |                                                                 |                                          |         |               |
| WP_005688477.1           | Putrescine/spermidine ABC transporter substrate-binding protein | VIVSSLESNETMYAK                          | 50      | 100           |

**Figure S1:** Properties of accessory proteins and development of the rMsrAB assay **A:** Activity of recombinant Thioredoxin reductase (rTrxR) with NADH or NADPH (substrate: DTNB). **B:** Insulin reduction by isolated rTrx and rTrxe. Activity is determined as an increase over time in the absorbance at 600 nm. **C:** rMsrAB assay with rTrxR and rTrx – effect of varying concentrations of rTrx on rMsrAB activity. Assay contained 10 mM R/S MPTS, 2  $\mu$ M rMsrAB, varying amounts of purified rTrx, 5  $\mu$ M rTrxR and 0.2 mM NADPH in 50 mM sodium phosphate buffer, pH 7.5 **D:** rMsrAB calmodulin repair assay including the MsrP control reactions.

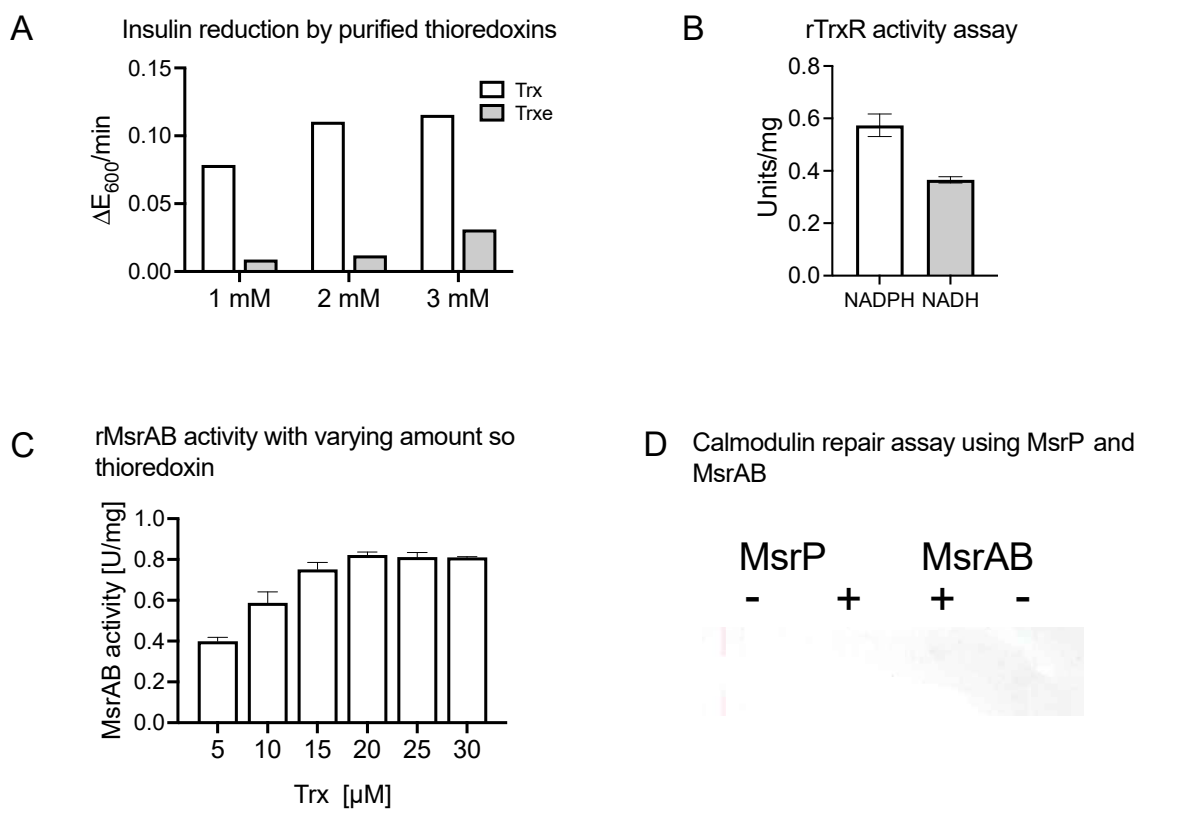

**Figure S2:** Changes of rMsrAB activity in thioredoxin-containing assays using *R/S*-MPTS

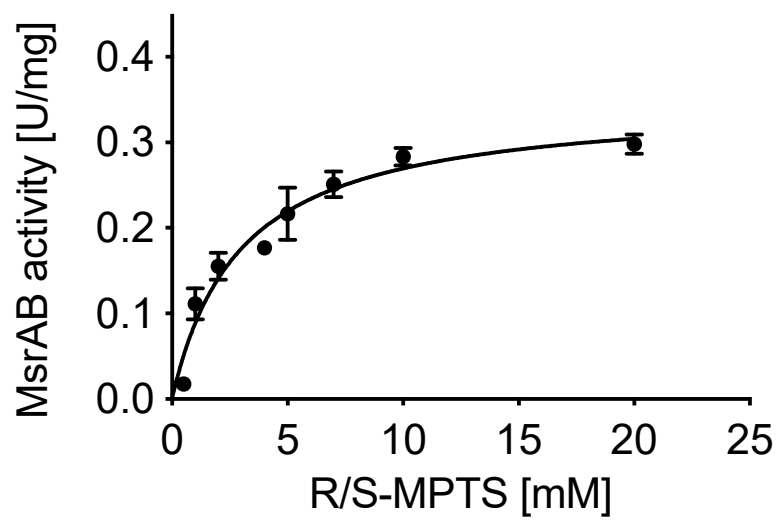

Supplement: s1 [file s1]
